# Supplementary material for: Promoting charge transfer in hyperbranched, trisoctahedral-shaped core–shell Au@PdPt nanoparticles by facet-dependent construction of transition layers as high performance electrocatalysts
Source: Royal Society of Chemistry journal article supplement (doi:10.1039/c7ta04250g), 2017-01-01
Supplement: c7ta04250g1.pdf [file c7ta04250g1.pdf]

**Promoting Charge Transfer in Hyperbranched, Trisoctahedral-shaped  
Core-Shell Au@PdPt Nanoparticles by Facet-dependently Constructing  
Transition Pd Layer as High Performance Electrocatalysts**

Yahui Song,<sup>a</sup> Cuixia Bi,<sup>a</sup> Chenshuo Wu,<sup>a</sup> Hongpeng He,<sup>a</sup> Lihui Huang,<sup>b</sup> Dayang Wang<sup>c</sup> and  
Haibing Xia<sup>\*,a</sup>

<sup>a</sup> State Key Laboratory of Crystal Materials, Shandong University, Jinan, 250100, P. R. China

<sup>b</sup> School of Environmental Science and Engineering, Shandong University, Jinan, 250100, P. R. China;

<sup>c</sup>State Key Laboratory of Inorganic Synthesis and Preparative Chemistry, College of Chemistry, Jilin University, Changchun 130012, P. R. China

E-mail: hbxia@sdu.edu.cn

**Figure S1.** HRTEM images of nanobranches on HTCS Au<sub>100</sub>@Pd<sub>20</sub>Pt<sub>20</sub> NPs with defects (such as atomic steps, kinks, and corner atoms).

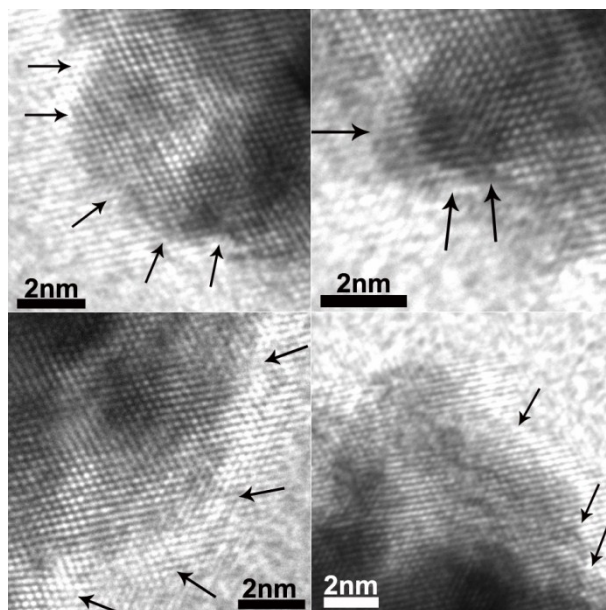

**Figure S2.** The digital photos of the aqueous solutions of TOH Au NPs (a), Au@Pd NPs prepared by only adding Pd<sup>2+</sup> ions before the addition of second batch of AA solution (b), Au@Pd NPs prepared by adding both Pd<sup>2+</sup> and Pt<sup>2+</sup> ions before the addition of second batch of AA solution (c), and HTCS Au<sub>100</sub>@Pd<sub>20</sub>Pt<sub>20</sub> NPs (d), respectively.

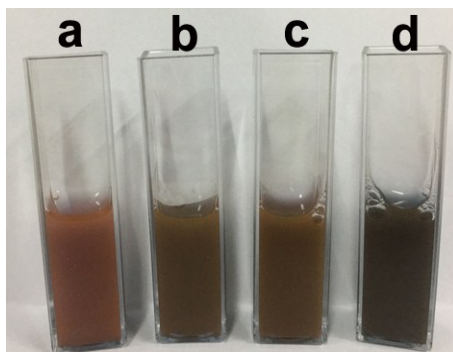

**Figure S3.** Low (a) and high magnification (b) TEM images of TOH-shaped Au@Pd NPs prepared by adding both Pd<sup>2+</sup> and Pt<sup>2+</sup> ions before the addition of second batch of AA solution, HRTEM images (c) recorded from the boxed area of (b), viewed along the  $\langle 011 \rangle$  direction and HAADF-STEM-EDS cross-sectional compositional line profile (d) of one TOH-shaped Au@Pd NP, in which red and blue colors represent the elemental Au and Pd, respectively. The inset in (c) is the corresponding FFT image.

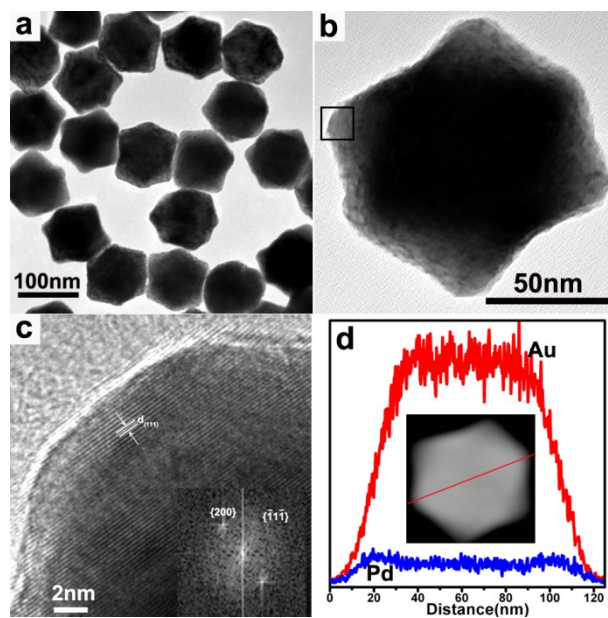

**Figure S4.** Low (a) and high magnification (b) TEM images of TOH-shaped Au@Pd NPs prepared by only adding Pd<sup>2+</sup> ions before the addition of second batch of AA solution.

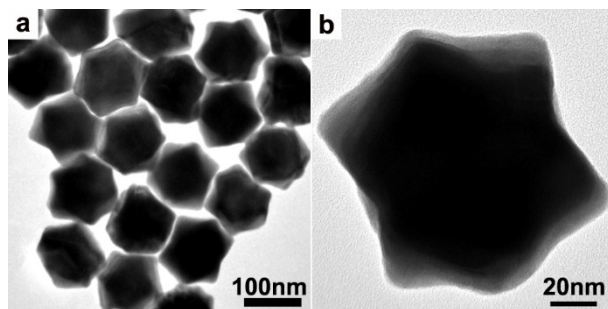

**Figure S5.** XRD pattern of as-prepared HTCS Au<sub>100</sub>@Pd<sub>20</sub>Pt<sub>20</sub> NPs.

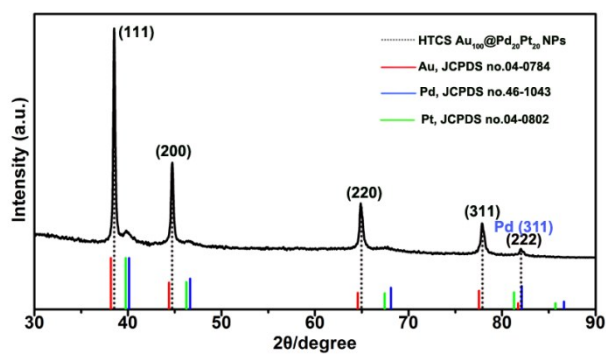

**Figure S6.** Low (a) and high magnification (b) TEM image of CS Au<sub>100</sub>@Pt<sub>20</sub> NPs.

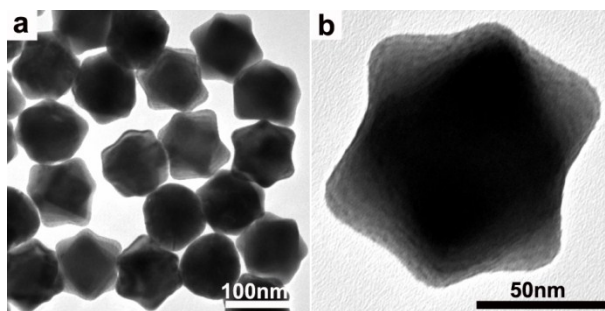

**Figure S7.** The digital photos of the aqueous solutions of TOH Au NPs, CS Au<sub>100</sub>@Pt<sub>20</sub> NPs, and HTCS Au<sub>100</sub>@Pd<sub>20</sub>Pt<sub>20</sub> NPs, respectively.

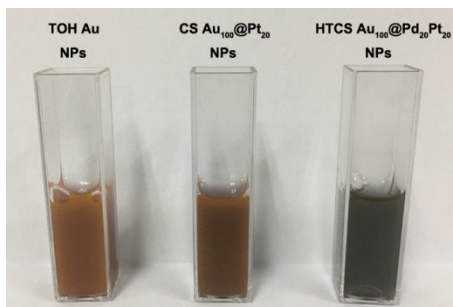



**Figure S8.** CV curves (A) and (B) of the GCE modified by Au<sub>100</sub>@Pt<sub>20</sub> (a, black curve) and HTCS Au<sub>100</sub>@Pd<sub>20</sub>Pt<sub>20</sub> NPs (b, red curve), which were measured in 0.50 M H<sub>2</sub>SO<sub>4</sub> solution in the absence (A) and presence (B) of 1.0 M methanol, respectively. The scan rates of (A) and (B) are 50 mV s<sup>-1</sup> and 20 mV s<sup>-1</sup>, respectively. The currents are normalized by the Pt mass loaded.

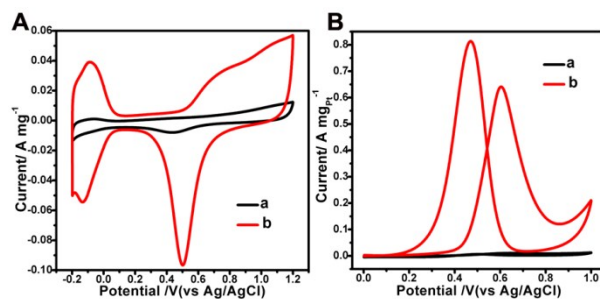

**Figure S9.** CV curves (A–C) of GCEs modified by HTCS Au<sub>100</sub>@Pd<sub>20</sub>Pt<sub>20</sub> NPs obtained at different AA-to-Pt molar ratios: 4 (a), 16 (b), 64 (c), 128 (d) and 256 (e), which were measured in 0.50 M H<sub>2</sub>SO<sub>4</sub> solution in the absence (A) and presence (B and C) of 1.0 M methanol, respectively. The currents are normalized by the Pt mass loaded on the GCE (A and B) and ECSA values (C), respectively. The scan rates are 50 mV s<sup>-1</sup> (A) and 20 mV s<sup>-1</sup> (B and C), respectively.

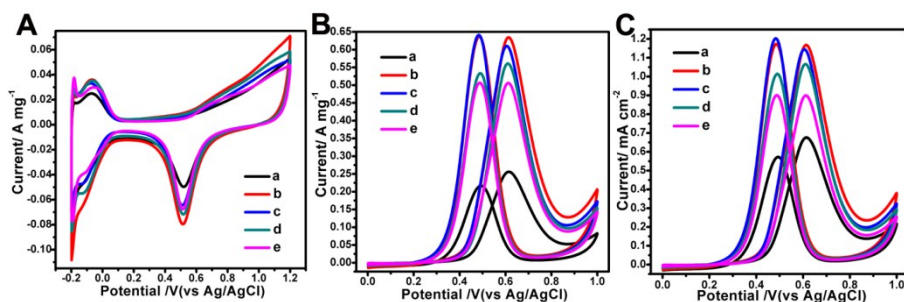

**Figure S10.** CV curves (A–C) of GCEs modified by HTCS Au@PdPt NPs obtained at different Pd-to-Pt molar ratios: 1.3:1 (a), 1.1:1 (b), 1:1 (c), 0.9:1 (d) and 0.8:1 (e), respectively, which were measured in 0.50 M H<sub>2</sub>SO<sub>4</sub> solution in the absence (A) and presence (B and C) of 1.0 M methanol, respectively. The currents are normalized by the Pt mass loaded on the GCE (A and B) and ECSA values (C), respectively. The scan rates are 50 mV s<sup>-1</sup> (A) and 20 mV s<sup>-1</sup> (B and C), respectively.

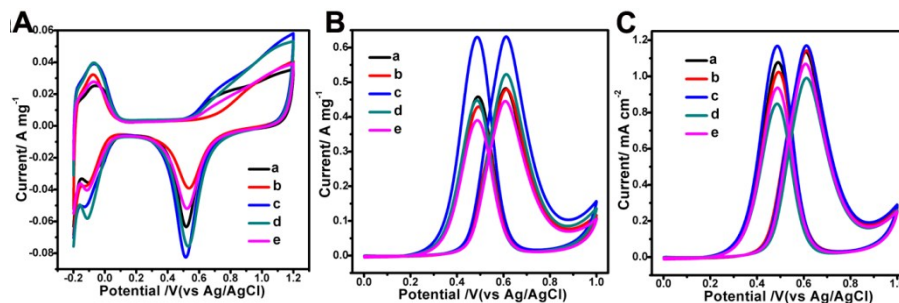

**Figure S11.** TEM images of HTCS Au<sub>100</sub>@Pd<sub>50</sub>Pt<sub>50</sub> (a), HTCS Au<sub>100</sub>@Pd<sub>25</sub>Pt<sub>25</sub> (b), HTCS Au<sub>100</sub>@Pd<sub>17</sub>Pt<sub>17</sub> (c), and HTCS Au<sub>100</sub>@Pd<sub>14</sub>Pt<sub>14</sub> NPs (d).

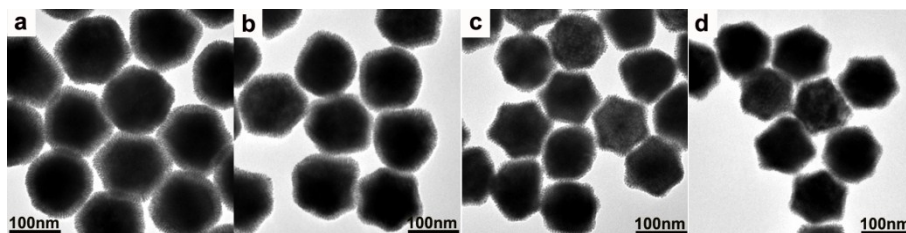

**Figure S12.** CV curves (A–C) of GCEs modified by HTCS Au<sub>100</sub>@Pd<sub>50</sub>Pt<sub>50</sub> NPs (a, black curve), Au<sub>100</sub>@Pd<sub>25</sub>Pt<sub>25</sub> NPs (b, red curve), Au<sub>100</sub>@Pd<sub>20</sub>Pt<sub>20</sub> NPs (c, blue curve), Au<sub>100</sub>@Pd<sub>17</sub>Pt<sub>17</sub> NPs (d, dark cyan curve), and Au<sub>100</sub>@Pd<sub>14</sub>Pt<sub>14</sub> NPs (e, magenta curve) measured in 0.50 M H<sub>2</sub>SO<sub>4</sub> solution in the absence (A) and presence (B and C) of 1.0 M methanol. The currents are normalized by the Pt mass loaded on the GCE (A and B) and ECSA values (C), respectively. The scan rates are 50 mV s<sup>-1</sup> (A) and 20 mV s<sup>-1</sup> (B and C), respectively.

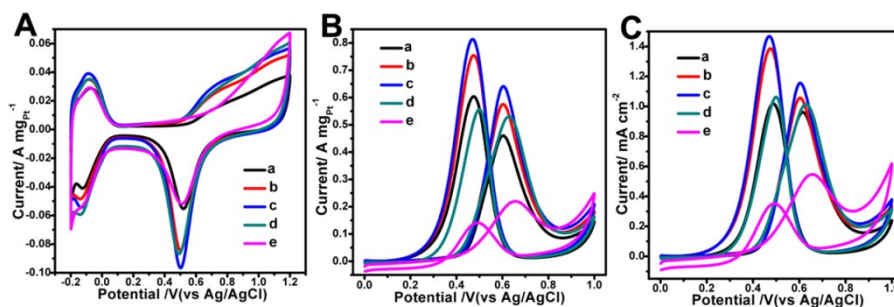

The ECSA values of HTCS Au<sub>100</sub>@Pd<sub>50</sub>Pt<sub>50</sub>, Au<sub>100</sub>@Pd<sub>25</sub>Pt<sub>25</sub>, Au<sub>100</sub>@Pd<sub>20</sub>Pt<sub>20</sub>, Au<sub>100</sub>@Pd<sub>17</sub>Pt<sub>17</sub>, and Au<sub>100</sub>@Pd<sub>14</sub>Pt<sub>14</sub> NPs are calculated to be 42.34, 54.44, 55.42, 52.33, and 40.22 m<sup>2</sup> g<sup>-1</sup> (Table S2), respectively, by measuring the charge collected in the hydrogen adsorption/ desorption region after double-layer correction in 0.5 M H<sub>2</sub>SO<sub>4</sub> solution at room temperature at a scan rate of 50 mV s<sup>-1</sup> (Figure S11A).

**Figure S13.** Low (a) and high magnification (b) TEM images of dendritic PdPt alloy NPs.

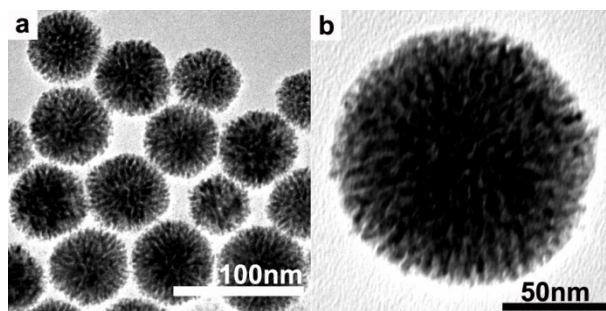

Typically, the aqueous solutions of  $\text{Na}_2\text{PdCl}_4$  (25 mM, 100  $\mu\text{L}$ ),  $\text{K}_2\text{PtCl}_4$  (25 mM, 100  $\mu\text{L}$ ) and AA (400 mM, 100  $\mu\text{L}$ ) were consecutively added into 5 mL of a 50 mM aqueous solution of CTAC, followed by gently shaking. The resultant solution was heated to 70°C and maintained for 3h in the sealed vial. Eventually, dendritic PdPt alloy NPs were obtained. The aqueous dispersion of dendritic PdPt alloy NPs was subjected to centrifugation (6000 rpm for 5 min, three times) to remove excess reagents. Subsequently, the resulting dendritic PdPt alloy NPs were redispersed in water with the assistance of sonication to make a colloidal suspension for further characterization.

**Figure S14.** TEM images of spherical Au NPs (a) and HSCS Au<sub>100</sub>@Pd<sub>20</sub>Pt<sub>20</sub> NPs (b). The inset in (b) is the corresponding high magnification TEM images of HSCS Au<sub>100</sub>@Pd<sub>20</sub>Pt<sub>20</sub> NPs.

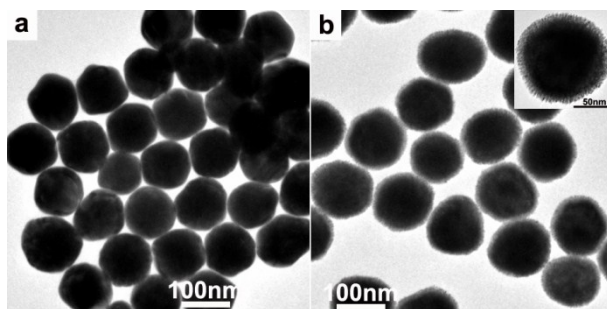

**Figure S15.** TEM images of octahedral Au NPs (a) and HOCS Au<sub>100</sub>@Pd<sub>20</sub>Pt<sub>20</sub> NPs (b). The inset in (b) is the corresponding high magnification TEM images of HOCS Au<sub>100</sub>@Pd<sub>20</sub>Pt<sub>20</sub> NPs.

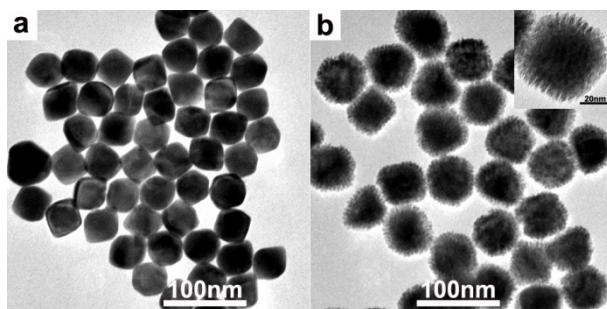



**Figure S16.** CV curves (A and B) and CA curves (C) of the GCEs modified by commercial Pt black (a, black curve), dendritic PdPt alloy NPs (b, red curve), HSCS Au<sub>100</sub>@Pd<sub>20</sub>Pt<sub>20</sub> NPs (c, blue curve), HOCS Au<sub>100</sub>@Pd<sub>20</sub>Pt<sub>20</sub> NPs (d, dark cyan curve), and HTCS Au<sub>100</sub>@Pd<sub>20</sub>Pt<sub>20</sub> NPs (e, magenta curve), respectively, which were measured in 0.50 M H<sub>2</sub>SO<sub>4</sub> in the presence of 0.5 M formic acid. The currents were normalized by the Pt mass loaded on the GCE (A and C) and ECSA values (B), respectively. The scan rates (A and B) were 20 mV s<sup>-1</sup>. CA curves (C) were recorded at 0.65 V.

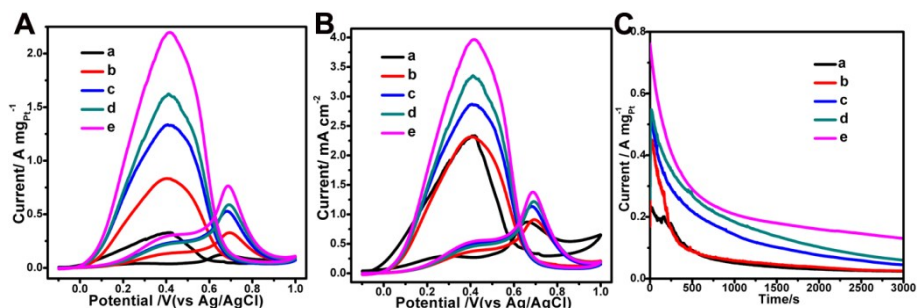

The electrochemical activities of the HTCS Au<sub>100</sub>@Pd<sub>20</sub>Pt<sub>20</sub> NPs on formic acid oxidation were also investigated. Figure S16A and B depict the mass and specific activities of the corresponding catalysts on formic acid oxidation recorded in 0.50 M H<sub>2</sub>SO<sub>4</sub> solution in the presence 0.50 M formic acid at 20 mV s<sup>-1</sup>. HTCS Au<sub>100</sub>@Pd<sub>20</sub>Pt<sub>20</sub> NPs exhibit a greatly improved mass-normalized current density (up to 0.77 A mg<sub>Pt</sub><sup>-1</sup>), which is 6.42, 2.33, 1.48, and 1.33 times than that of commercial Pt black (0.12 A mg<sub>Pt</sub><sup>-1</sup>), dendritic PdPt alloy NPs (0.33 A mg<sub>Pt</sub><sup>-1</sup>), HSCS Au<sub>100</sub>@Pd<sub>20</sub>Pt<sub>20</sub> NPs (0.52 A mg<sub>Pt</sub><sup>-1</sup>), and HOCS Au<sub>100</sub>@Pd<sub>20</sub>Pt<sub>20</sub> NPs (0.58 A mg<sub>Pt</sub><sup>-1</sup>), respectively. Moreover, the HTCS Au<sub>100</sub>@Pd<sub>20</sub>Pt<sub>20</sub> NPs also exhibit a greatly improved specific activity (1.39 mA cm<sup>-2</sup>) compared to that of other catalysts (Table S3), indicating that the defects (such as atomic steps, kinks, and corner atoms) on the surfaces of the PdPt nanobranches act as highly active sites for formic acid oxidation. In addition, CA curves for 3000 s also demonstrated the stability of HTCS Au<sub>100</sub>@Pd<sub>20</sub>Pt<sub>20</sub> NPs on the formic acid oxidation (Figure S16C). It is evident that the HTCS Au<sub>100</sub>@Pd<sub>20</sub>Pt<sub>20</sub> NPs also exhibit markedly enhanced electrocatalytic activity on formic acid oxidation among these catalysts.

**Figure S17.** Low (a) and high magnification (b) TEM image and HRTEM image (c) recorded from the boxed area of (b) of HTCS Au<sub>100</sub>@Pd<sub>20</sub>Pt<sub>20</sub> NPs collected after CA measurement.

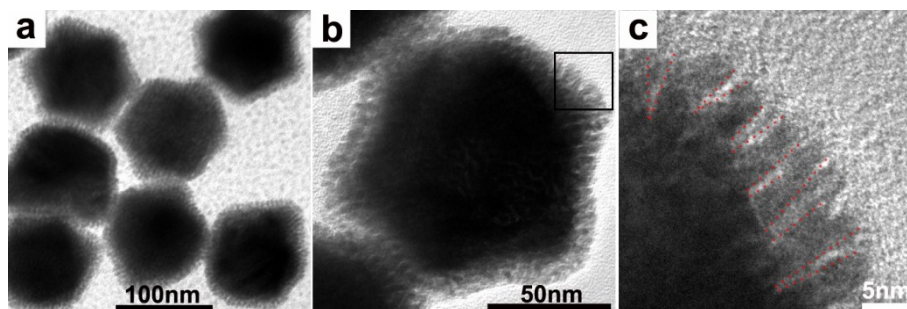

**Figure S18.** XPS spectra of the Pd 3d and Pt4d signals of dendritic PdPt alloy NPs (A) and HTCS Au<sub>100</sub>@Pd<sub>20</sub>Pt<sub>20</sub> NPs (B).

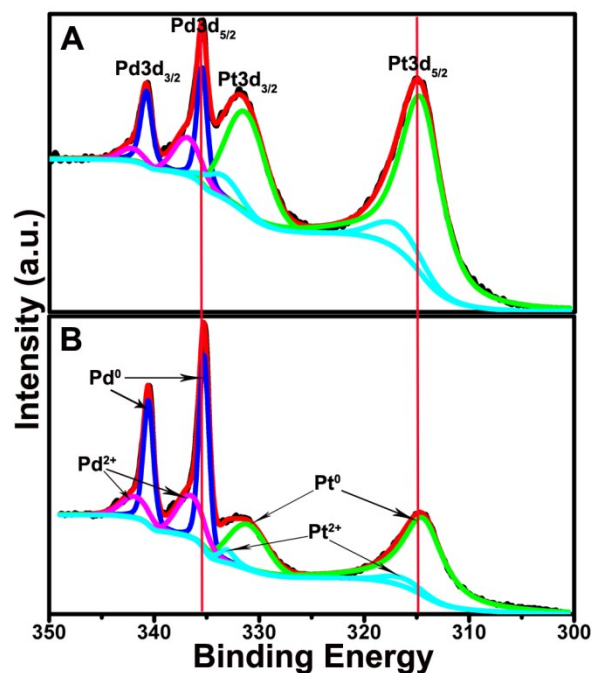

The peaks that appear at 340.0 and 335.0 eV in Figure S17 are assigned to Pd 3d<sub>3/2</sub> and Pd 3d<sub>5/2</sub>, respectively.<sup>1,2</sup> Pd 3d could be deconvoluted into four individual peaks, i.e., 335.2 and 340.5 eV and 336.8 and 342.1 eV, corresponding to the metallic state (Pd<sup>0</sup>) and oxide state (Pd<sup>2+</sup>) of Pd, respectively. In addition, the BE values of Pd<sup>0</sup> 3d<sub>3/2</sub> and Pd<sup>0</sup> 3d<sub>5/2</sub> in the HTCS Au<sub>100</sub>@Pd<sub>20</sub>Pt<sub>20</sub> NPs also negatively shift ca. 0.3 eV compared to that of the dendritic PdPt alloy NPs (Table S4).

**Figure S19.** XPS spectra of the Au 4f signals of TOH Au NPs (A) and HTCS Au<sub>100</sub>@Pd<sub>20</sub>Pt<sub>20</sub> (B).

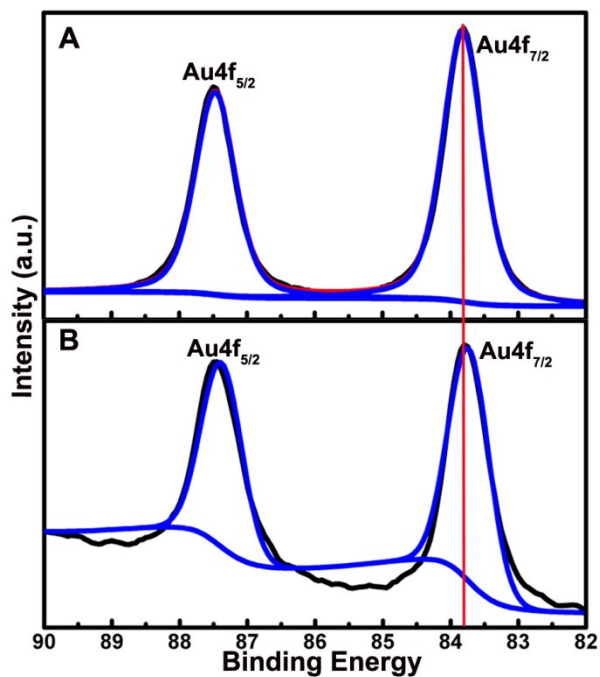

**Figure S20.** Representative SERS spectra of 4-ATP molecules ( $1 \times 10^{-4}$  M) adsorbed on the aggregates of HTCS Au<sub>100</sub>@Pd<sub>20</sub>Pt<sub>20</sub> NPs, HOCS Au<sub>100</sub>@Pd<sub>20</sub>Pt<sub>20</sub> NPs, HSCS Au<sub>100</sub>@Pd<sub>20</sub>Pt<sub>20</sub> NPs, and dendritic PdPt alloy NPs on glass substrates. The excitation laser wavelength for Raman measurements is 633 nm. The acquisition time is 30 s.

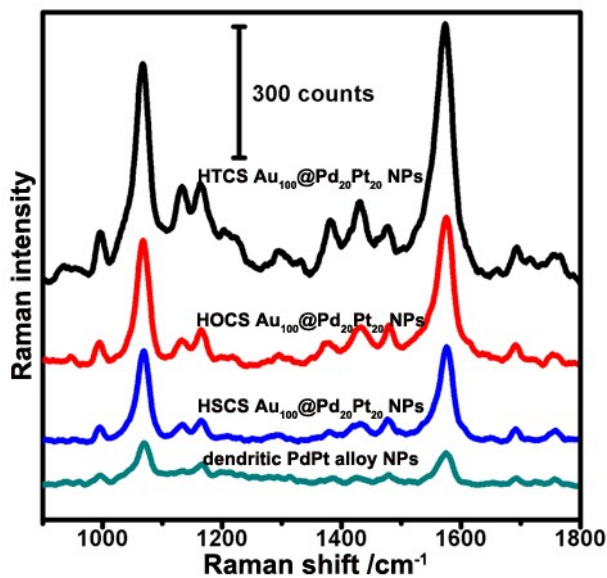

**Figure S21.** CO stripping measurements of commercial Pt black catalysts (a), commercial Pd/C catalysts (b), TOH Au NPs (c), dendritic PdPt alloy NPs (d) and HTCS Au<sub>100</sub>@Pd<sub>20</sub>Pt<sub>20</sub> NPs (e) performed in a solution of 0.50 M H<sub>2</sub>SO<sub>4</sub> at 50 mV s<sup>-1</sup>.

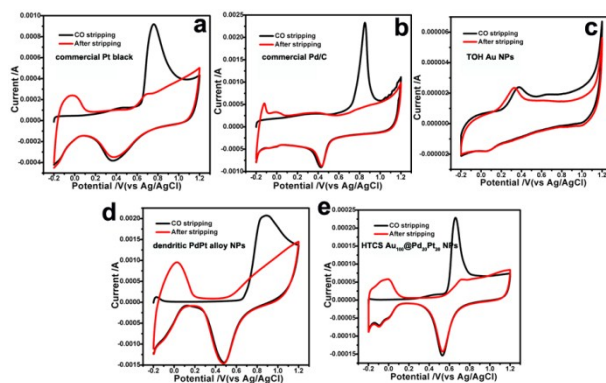

**Table S1.** Summary of the total compositions of TOH-shaped Au@Pd NPs and HTCS Au<sub>100</sub>@Pd<sub>20</sub>Pt<sub>20</sub> NPs by EDS.

| Sample                                                        | Au(%) | Pd(%) | Pt(%) |
|---------------------------------------------------------------|-------|-------|-------|
| TOH-shaped Au@Pd NPs                                          | 93.5  | 6.5   | 0     |
| HTCS Au <sub>100</sub> @Pd <sub>20</sub> Pt <sub>20</sub> NPs | 79.4  | 10    | 10.6  |

**Table S2.** Summary of molar ratio of Au/Pd/Pt, ECSAs, mass- and ECSA-normalized current densities of GCEs modified by HTCS Au<sub>100</sub>@Pd<sub>50</sub>Pt<sub>50</sub>, Au<sub>100</sub>@Pd<sub>25</sub>Pt<sub>25</sub>, Au<sub>100</sub>@Pd<sub>20</sub>Pt<sub>20</sub>, Au<sub>100</sub>@Pd<sub>17</sub>Pt<sub>17</sub>, and Au<sub>100</sub>@Pd<sub>14</sub>Pt<sub>14</sub> NPs as catalysts on methanol oxidation in 0.50 M H<sub>2</sub>SO<sub>4</sub> solution containing 1.0 M methanol, respectively.

| Sample                                                        | Molar ratio of Au/Pd/Pt | ECSA [m <sup>2</sup> g <sub>Pt</sub> <sup>-1</sup> ] | Mass activity [A mg <sub>Pt</sub> <sup>-1</sup> ] | Specific activity [mA cm <sup>-2</sup> ] |
|---------------------------------------------------------------|-------------------------|------------------------------------------------------|---------------------------------------------------|------------------------------------------|
| HTCS Au <sub>100</sub> @Pd <sub>50</sub> Pt <sub>50</sub> NPs | 1:0.5:0.5               | 42.34                                                | 0.41                                              | 0.92                                     |
| HTCS Au <sub>100</sub> @Pd <sub>25</sub> Pt <sub>25</sub> NPs | 1:0.25:0.25             | 54.44                                                | 0.58                                              | 1.06                                     |
| HTCS Au <sub>100</sub> @Pd <sub>20</sub> Pt <sub>20</sub> NPs | 1:0.2:0.2               | 55.42                                                | 0.64                                              | 1.16                                     |
| HTCS Au <sub>100</sub> @Pd <sub>17</sub> Pt <sub>17</sub> NPs | 1:0.17:0.17             | 52.33                                                | 0.53                                              | 1.01                                     |
| HTCS Au <sub>100</sub> @Pd <sub>14</sub> Pt <sub>14</sub> NPs | 1:0.14:0.14             | 40.22                                                | 0.22                                              | 0.55                                     |



**Table S3** Summary of the total compositions of HTCS Au<sub>100</sub>@Pd<sub>20</sub>Pt<sub>20</sub> NPs, HOCS Au<sub>100</sub>@Pd<sub>20</sub>Pt<sub>20</sub> NPs, and HSCS Au<sub>100</sub>@Pd<sub>20</sub>Pt<sub>20</sub> NPs by ICP-AES.

| Sample                                                        | Au(%) | Pd(%) | Pt(%) |
|---------------------------------------------------------------|-------|-------|-------|
| HTCS Au <sub>100</sub> @Pd <sub>20</sub> Pt <sub>20</sub> NPs | 100   | 18.7  | 10    |
| HOCS Au <sub>100</sub> @Pd <sub>20</sub> Pt <sub>20</sub> NPs | 100   | 18.2  | 9.6   |
| HSCS Au <sub>100</sub> @Pd <sub>20</sub> Pt <sub>20</sub> NPs | 100   | 17.3  | 9.1   |

**Table S4.** Summary of mass- and ECSA-normalized current densities of GCEs modified by commercial Pt black, dendritic PdPt alloy NPs, HSCS Au<sub>100</sub>@Pd<sub>20</sub>Pt<sub>20</sub> NPs, HOCS Au<sub>100</sub>@Pd<sub>20</sub>Pt<sub>20</sub> NPs, and HTCS Au<sub>100</sub>@Pd<sub>20</sub>Pt<sub>20</sub> NPs as catalysts on formic acid oxidation in 0.50 M H<sub>2</sub>SO<sub>4</sub> solution containing 0.50 M formic acid, respectively.

| Sample                                                        | Mass activity<br>[A mg <sub>Pt</sub> <sup>-1</sup> ] | Specific activity<br>[mA cm <sup>-2</sup> ] |
|---------------------------------------------------------------|------------------------------------------------------|---------------------------------------------|
| commercial Pt black                                           | 0.12                                                 | 0.86                                        |
| dendritic PdPt alloy NPs                                      | 0.33                                                 | 0.92                                        |
| HSCS Au <sub>100</sub> @Pd <sub>20</sub> Pt <sub>20</sub> NPs | 0.52                                                 | 1.12                                        |
| HOCS Au <sub>100</sub> @Pd <sub>20</sub> Pt <sub>20</sub> NPs | 0.58                                                 | 1.20                                        |
| HTCS Au <sub>100</sub> @Pd <sub>20</sub> Pt <sub>20</sub> NPs | 0.77                                                 | 1.39                                        |

**Table S5.** XPS shifts for the Pd 3d signals for dendritic PdPt alloy NPs and HTCS Au<sub>100</sub>@Pd<sub>20</sub>Pt<sub>20</sub> NPs.

| Sample                                                        | Pd 3d <sub>5/2</sub> peak (eV) | Pd 3d <sub>3/2</sub> peak (eV) | $\Delta$ Pd 3d <sub>5/2</sub> (eV) |
|---------------------------------------------------------------|--------------------------------|--------------------------------|------------------------------------|
| dendritic PdPt alloy NPs                                      | 335.5                          | 340.8                          | 0                                  |
| HTCS Au <sub>100</sub> @Pd <sub>20</sub> Pt <sub>20</sub> NPs | 335.2                          | 340.5                          | -0.3                               |

**Table S6.** XPS shifts for the Au 4f signals for TOH Au NPs and HTCS Au<sub>100</sub>@Pd<sub>20</sub>Pt<sub>20</sub> NPs.

| Sample                                                        | Au 4f <sub>7/2</sub> peak (eV) | Au 4f <sub>5/2</sub> peak (eV) | $\Delta$ Au 4f <sub>7/2</sub> (eV) |
|---------------------------------------------------------------|--------------------------------|--------------------------------|------------------------------------|
| TOH Au NPs                                                    | 83.8                           | 87.45                          | 0                                  |
| HTCS Au <sub>100</sub> @Pd <sub>20</sub> Pt <sub>20</sub> NPs | 83.76                          | 87.41                          | -0.04                              |

## Reference

1. H. A. Esfahani, L. Wang, Y. Nemoto and Y. Yamauchi, *Chem. Mater.*, 2010, **22**, 6310.
2. Q. R. Shi, C. Z. Zhu, Y. J. Li, H. B. Xia, M. H. Engelhard, S. F. Fu, D. Du and Y. H. Lin, *Chem. Mater.*, 2016, **28**, 7928.
